# Supplementary material
Source: Springer Nature journal article supplement (https://www.springermedizin.de/resource/supplementary/12936_2013_2671_MOESM10_ESM.pdf/9545084)

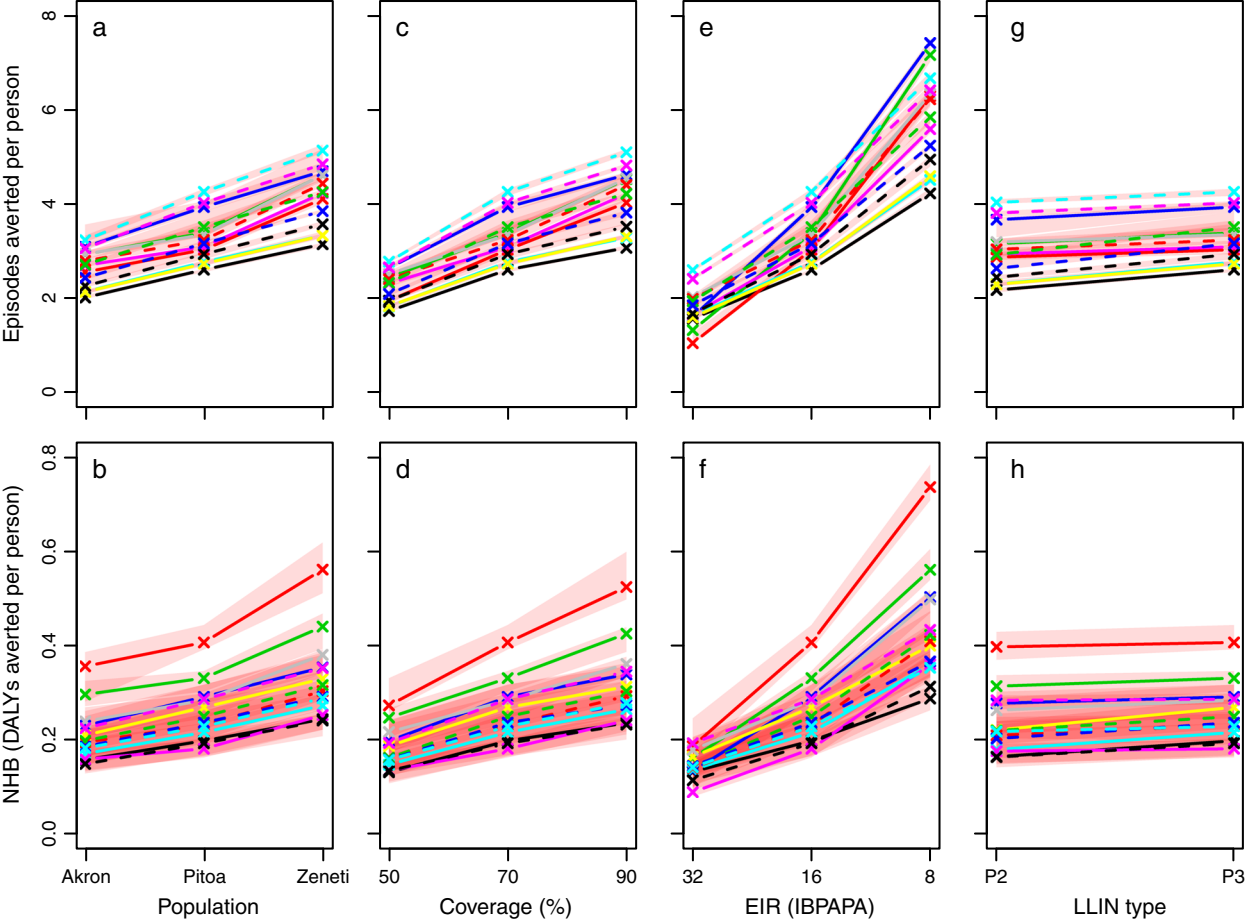

Supplement: MOESM10 [file 9545084]
